# Supplementary material for: How COVID-19 Pandemic Has Influenced Public Interest in Foods: A Google Trends Analysis of Italian Data
Source: MDPI journal article supplement (doi:10.3390/ijerph20031976), 2023-01-20
Supplement: s1 [file s1]

Figure S1. Joinpoint analysis of the public interest in nuts and seeds

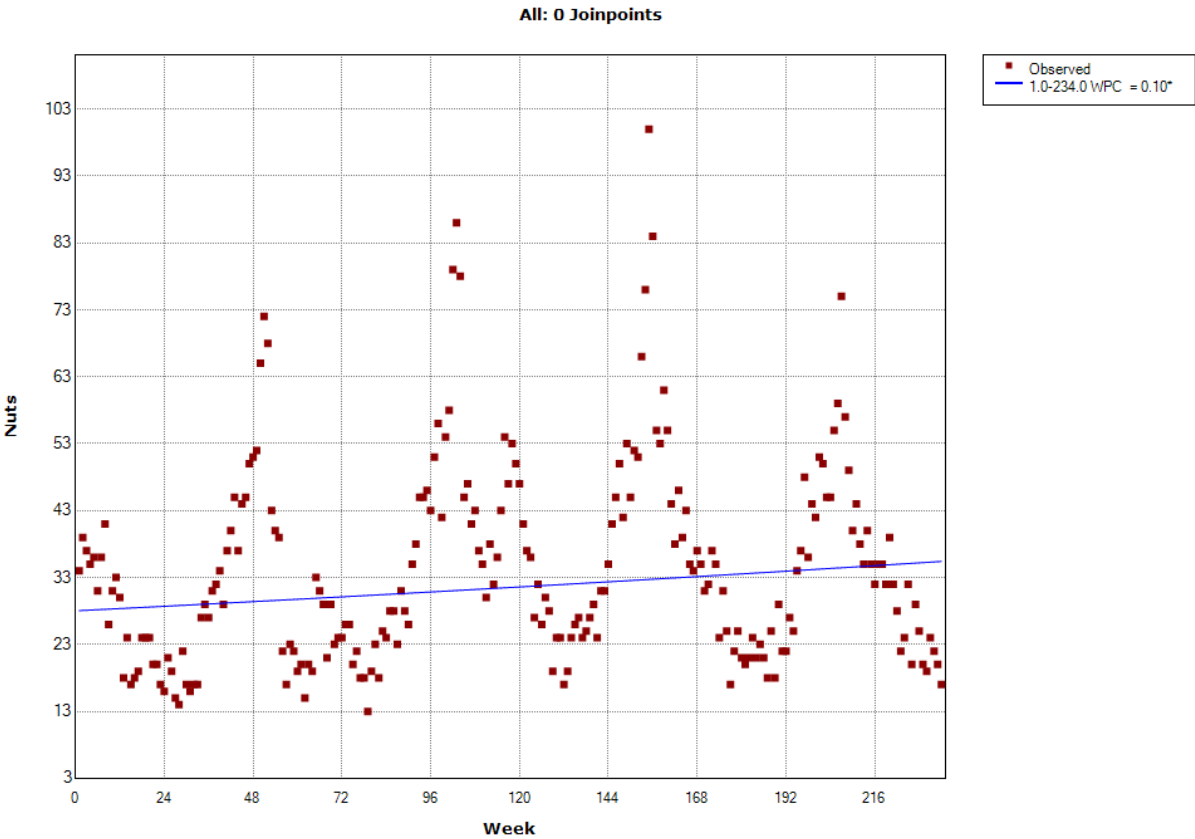

\* Indicates that the Weekly Percent Change (WPC) is significantly different from zero at the alpha = 0.05 level.

Figure S2. Joinpoint analysis of the public interest in processed meat

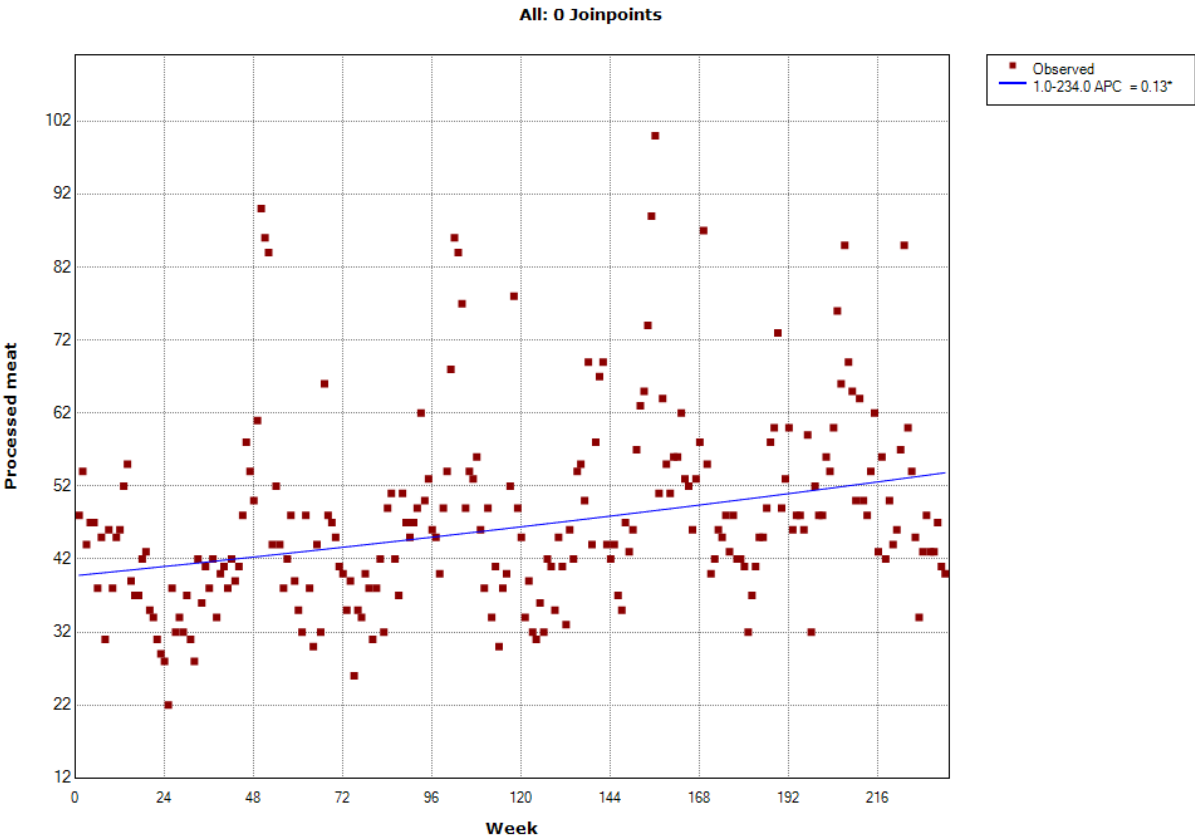

\* Indicates that the Annual Percent Change (APC) is significantly different from zero at the alpha = 0.05 level.

**Figure S3. Joinpoint analysis of the public interest in sugar sweetened beverages**

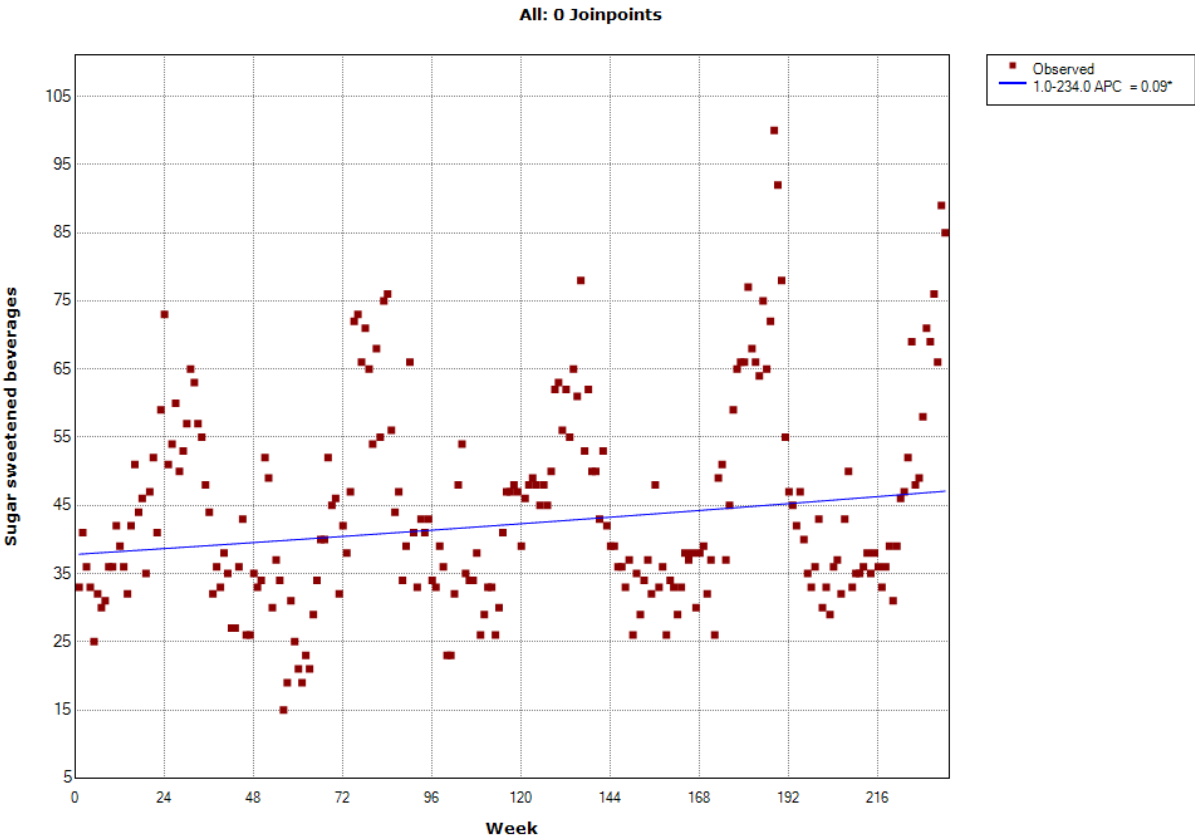

\* Indicates that the Annual Percent Change (APC) is significantly different from zero at the alpha = 0.05 level.
